# Supplementary material for: Danggui Buxue Tang, a simple Chinese formula containing Astragali Radix and Angelicae Sinensis Radix, stimulates the expressions of neurotrophic factors in cultured SH-SY5Y cells
Source: PubMed Central journal article supplement (PMC5568261; doi:10.1186/s13020-017-0144-y), 2017-08-22

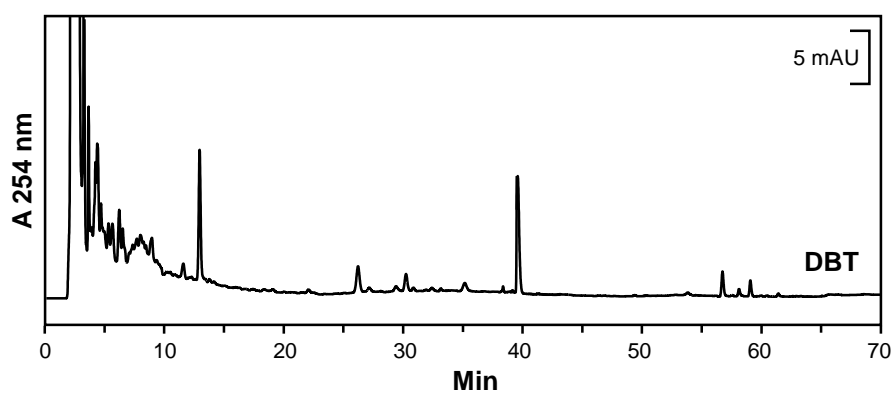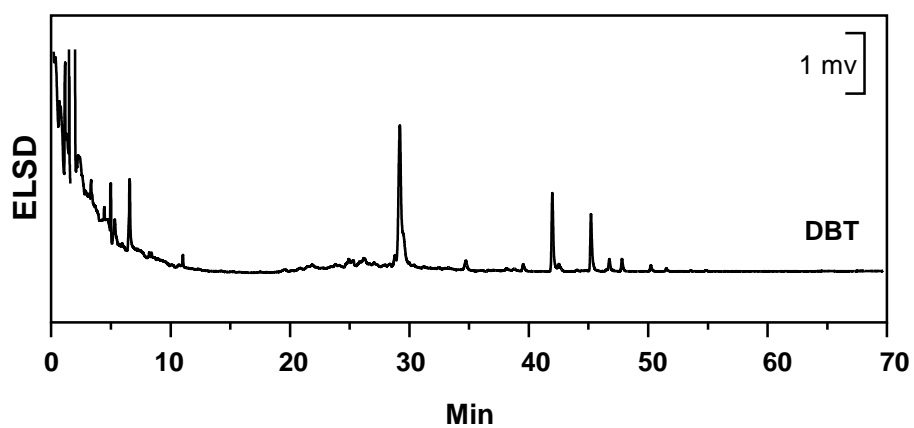

Supplement: 13020_2017_144_MOESM2_ESM.pdf [file 13020_2017_144_MOESM2_ESM.pdf]
